# Supplementary material for: Spatial and space-time clustering of tuberculosis in Gurage Zone, Southern Ethiopia
Source: PLoS One. 2018 Jun 5;13(6):e0198353. doi: 10.1371/journal.pone.0198353 (PMC5988276; doi:10.1371/journal.pone.0198353)
Supplement: S1 Table — (XLSX) [file pone.0198353.s001.xlsx]

## Sheet: Sheet1
Awasir	18	28408.5	7.95	37.85
Egeze	12	21229.7	7.95	37.82
Tumane	21	24024	7.98	37.8
Wersibate	0	24773.6	7.93	37.82
Weshezewiyar	16	33077	7.97	37.83
Andahore	11	20559.5	8.05	37.87
Daemir	5	17663	8.07	37.83
Egebegn	17	29896.5	8.07	37.87
Enangera	16	23819.5	8.03	37.92
Kosed	14	26579.7	8.01	37.9
Shanka	21	25977.7	8.03	37.87
Achawede	35	27749.7	8.12	37.76
Ebaragn	42	23592.3	8.1	37.84
Shafamo	46	28363	8.13	37.77
Terede	30	32179.6	8.09	37.79
Terhogne	22	23535.5	8.09	37.82
Werkate	45	30260	8.13	37.8
Agare	37	26602.4	8.04	37.69
Denber	43	22910.8	8.08	37.77
Gerenbo	34	19809.8	8.12	37.7
Gomshe	60	30498.5	8.06	37.77
Gonchebete	80	32088.7	8.12	37.64
Gondereche	44	24512.4	8.11	37.74
Horbet Zizo	45	24148.9	8.1	37.7
Jatu	69	30771.1	8.05	37.64
Kerebed	53	31384.5	8.04	37.76
Alibo	43	30135	7.93	37.78
Bortene	28	23149.3	7.99	37.75
Doba	49	24932.7	7.97	37.69
Ke-end	32	31066.5	7.97	37.77
Mi-edy	23	29987.4	7.95	37.8
Shimoro	34	23626.4	7.99	37.72
Tarbe Eshekura	9	19003.4	7.93	37.76
Wedesha	49	27795.1	9.94	37.71
Weyra	43	25864.1	7.95	37.75
Barwa	28	23637.8	7.86	37.75
Deyas	33	20877.6	7.87	37.75
Egendana Tarbe	35	23785.4	7.88	37.76
Ener Gedam	61	29953.3	7.87	37.76
Gaureba	22	23194.8	7.9	37.79
Kose Town	60	19003.4	7.86	37.73
Lankatore	14	19639.4	7.9	37.76
Abirir	65	41028.2	7.87	37.89
Anzeche	38	28181.3	7.91	37.8
Astir	45	39960.4	7.91	37.86
Awid	65	44969.7	7.89	37.89
Barugn	40	25125.8	7.91	37.83
Mafed	67	25614.2	7.89	37.84
Yekatit	33	32599.9	7.89	37.83
Esseher	23	30487.1	8.01	37.77
Gardashe	24	39256.2	8.03	37.74
Guntana	28	24489.7	8.01	37.72
Mekana	15	34621.8	8.01	37.8
Sundikay	30	27567.9	7.98	37.78
Amogera	34	38302	7.8	37.86
Gahrad	29	33474.5	7.99	37.84
Gasawde	28	26818.2	8.02	37.85
Gunchire Town	88	55851.5	8.03	37.83
Hured	21	31907	8.02	37.82
Kasay	19	32827.1	8.07	37.81
Kochira	27	37279.7	8.05	37.82
Wenche	18	23978.5	7.99	37.81
Abogade	18	35507.8	7.98	37.86
Agata1	18	46866.6	7.92	37.91
Kanas	29	45912.5	7.94	37.88
Kuneber	16	22979	7.96	37.88
Hudad 4 Ena Yayaotuna	33	36655	8.36	37.49
Hudad 5 Ena 6	32	42936.4	8.4	37.55
Hudad 7	15	18946.6	8.43	37.56
Dargie	268	82374.4	8.42	37.53
Aboko	9	9507.36	8.35	37.68
Bido(Bedotedele)	34	38449.7	8.3	37.64
Boketana Serete	22	28022.3	8.25	37.62
Chisana Korbesa	28	13573.8	8.32	37.66
Fante	14	11904.1	8.26	37.7
Gibe Yemengest Ersha	88	11608.7	8.25	37.56
Jebjebana Gasore	18	28385.8	8.26	37.73
Lachena Omancho	3	12562.9	8.31	37.7
Tewelana Gefersa	36	23081.2	8.29	37.68
Ambalta	15	19537.2	8.3	37.86
Diri Lafto	9	9700.46	8.36	37.75
Layegnawgerabana Tachegnawtetesa	15	21604.5	8.27	37.81
Mamedie	28	10211.6	8.27	37.84
Michlena Tereko	2	12721.9	8.33	37.75
Tachegnaw Geraba	4	13846.4	8.26	37.79
Tatesa(Laynegnaw)	14	17742.5	8.29	37.83
Tubana Telilo	17	15198.1	8.33	37.71
Borrorbeluna Borrortedele	32	29953.3	8.29	37.51
Fitena Jaju	178	45923.8	8.31	37.58
Kulit 2	45	26068.6	8.37	37.55
Mida Tedele	3	56782.9	8.35	37.63
Necha Kulit	104	52466.5	8.35	37.55
Walga	26	7939.84	8.27	37.58
Abrit	38	28828.8	8.05	37.91
Aftir	72	41403	8.06	37.92
Gohana Temborihe	36	34553.6	8.03	37.95
Dekuna	31	41857.4	8.08	38
Moche	27	41777.8	8.05	38.01
Kechiwetena dawke	11	38245.2	8.05	38.04
Emdiber Town	119	73696.2	8.12	37.93
Girarina Feremazgibe	42	38313.4	8.1	37.96
Ager	30	44958.3	8.07	37.94
Yedebe	19	26261.7	8.08	37.95
Yefereziye	35	39040.4	8.15	37.94
Yeweze	22	27352.1	8.1	37.91
Astepa	30	35076.1	8.1	37.9
Awukekir	28	30918.8	8.09	37.87
Bakanwot	29	35712.2	8.13	37.84
Girar Dibir	27	25602.8	8.13	37.88
Megenase	42	34258.3	8.13	37.87
Adoshena Atorche	49	31850.2	8.16	37.82
Yefekterekindebera	69	55840.1	8.15	37.9
Yefekterekwodiro	45	35507.8	8.18	37.88
Wurerberna Wesharbe	58	21661.3	8.18	37.85
Enate	17	19571.3	8.05	37.95
Yejoka	16	31498.1	8.03	37.97
Yesasiye Kuash	12	21150.2	8.06	37.96
Yetaneka	26	27965.5	8.04	37.99
Borana Tuba	21	22456.4	8.23	37.69
Ebrena Kachene	25	14028.2	8.21	37.67
Gurdena Garenbo	31	24841.8	8.15	37.7
Jatona Aradashe	12	20241.5	8.2	37.71
Lukena Eba	26	20400.5	8.18	37.63
Yeshirena Kondaricha	10	18003.8	8.18	37.71
Azerina Sisa	13	36427.8	8.18	37.77
Buchachina Deneb	29	28306.3	8.2	37.81
Degag Herare	33	40414.8	8.15	37.74
Dubisa	1	27897.3	8.21	37.75
Gasorena Karacha	23	47718.5	8.22	37.78
Hewanina Chukuate	3	34565	8.23	37.81
Sisona Imatye	0	29305.8	8.18	37.8
Wordanena Korkuate	26	21252.4	8.16	37.79
Woshirebena Worbeche	9	19866.6	8.21	37.84
Ayin	1	49286	7.77	37.87
Bacha(Becha)	64	34576.3	7.8	37.87
Dabir Tsige	2	44276.8	7.84	37.85
Genet	67	40312.6	7.84	37.9
Gomira	35	45265	7.79	37.91
Sharko	43	20741.3	7.82	37.89
Tafeke	53	36893.5	7.81	37.9
Wilo Lera	1	36802.7	7.76	37.88
Araticho	40	22433.7	7.87	37.78
Bucha	45	52512	7.83	37.81
Dinkula Town	25	8700.88	7.84	37.83
Essemat	57	24932.7	7.87	37.8
Hareg	27	20502.7	7.84	37.86
Jeda	41	23172.1	7.9	37.87
Shawura	71	28624.3	7.85	37.82
Welecho	57	23603.7	7.85	37.84
Zigez	63	21218.3	7.83	37.85
Git(Keres)	27	24671.4	7.82	37.84
Agena Town	81	42141.3	8.14	38
Guyena Yesiba	16	43572.5	8.09	38.03
Keretemo	31	24217.1	8.15	38.05
Nesha	14	15107.3	8.17	38.04
Selam1	18	27931.4	8.17	38.09
Wadiye	24	29851.1	8.17	38.02
Wort	28	26204.9	8.16	38.07
Yegobat	21	30066.9	8.17	38
Yesiray	22	41959.6	8.13	38.03
Aguashi Terah	37	31168.7	8.2	37.92
Darchana Yebereha Sawerhye	38	36893.5	8.25	37.87
Shebraden	59	28010.9	8.16	37.95
Sheramo	49	44890.2	8.19	37.94
Zigbabotona Yediyewana	34	26238.9	8.21	37.87
Ambagenet	32	26579.7	8.12	37.98
Deseno	36	24955.4	8.21	37.9
Mentir	44	31566.2	8.17	37.97
Gedeb	34	49774.5	8.12	38.08
Koterigedira	16	30498.5	8.08	38.08
Shemane	29	43924.7	8.08	38.11
Wesemer	23	24955.4	8.1	38.05
Yesurana Wariwura	12	35110.2	8.06	38.07
Ambele	70	60485.9	8.14	38.12
Bozheber	44	58066.4	8.12	38.19
Ketene	41	40960	8.12	38.12
Kokera	33	42175.4	8.11	38.15
Sabola1	30	47116.5	8.09	38.15
Ambelta	7	22592.7	8.32	38.04
Bedere	39	34178.8	8.33	38.08
Bone	29	37109.4	8.38	38.07
Enge Town	18	5270.51	8.37	38.06
Giche Dimtu	31	30248.6	8.41	38.11
Sodo Aybegern	33	29555.7	8.38	38.1
Areda	13	21059.3	8.28	38.24
Asfadin	12	14868.7	8.28	38.23
Ereso	15	20559.5	8.28	38.26
Gerino	39	46366.8	8.25	38.26
Kentuwat	50	67664.7	8.24	38.23
Borobor Sefato	13	8973.49	8.3	38.25
Gomra	13	23206.1	8.31	38.27
Hadero	11	15720.6	8.28	38.3
Kurbano	31	28283.5	8.27	38.28
Mehal Gutazer	17	7224.23	8.32	38.24
Wolaga Desie	13	56964.6	8.3	38.31
Zelowan Sefato	27	31907	8.33	38.2
Denab	26	19878	8.4	38.14
Desa	34	32009.2	8.39	38.17
Mehal Amba Town	44	15834.2	8.41	38.24
Meranto Kesib	51	83249	8.36	38.27
Oche	59	63677.7	8.39	38.21
Sefatona Kersa	33	24716.9	8.39	38.2
Tilmo	44	53454.7	8.38	38.23
Zare	32	34087.9	8.37	38.25
Amuto	18	22536	8.36	38.14
Fitie	46	30555.3	8.33	38.12
Hutir	33	51364.7	8.27	38.14
Jimma	19	25023.5	8.32	38.14
Kecha	21	21377.4	8.32	38.17
Megoragur	19	23478.7	8.3	38.1
Teyba	19	27465.7	8.26	38.17
Wubon	19	30543.9	8.3	38.18
Hambiyati	28	31679.8	7.99	37.9
Wonzirena Gorat	29	26738.7	7.99	37.92
Worko	22	48604.5	7.96	37.91
Zara	32	44072.3	8	37.94
Atazo	12	64597.8	7.85	37.92
Eskute	36	48320.5	7.92	37.93
Esmander	22	36132.5	7.94	37.94
Fuchare	27	61712.6	7.89	37.93
Ediget	11	35848.5	8.77	38
Kebul Town	103	75525	7.88	38.03
Sabola2	44	62314.6	7.89	37.99
Sananina Koroficha	65	77933.1	7.94	37.99
Silasie	31	48320.5	7.91	37.97
Agata2	31	33156.5	7.94	37.96
Fegnekir	49	50149.3	7.98	37.97
Kuante Town	50	43822.4	7.97	37.94
Abeke	70	64541	7.92	38.04
Abesuja	37	59827.1	7.97	38.11
Areket Kenema (Town)	94	33201.9	7.94	38.07
Areket Sheleko	41	49535.9	7.93	38.07
Burdana Denber	84	58327.7	7.99	38.09
Essenna Adengazo	135	74866.2	7.97	38.06
Badina Yegor	39	50683.2	7.99	38
Bercherina Mocheya	14	31361.8	8.02	38
Amdem	39	35894	8.05	38.09
Asslecha	34	36280.2	8.07	38.16
Dirbona Senen	43	33633.6	8.05	38.13
Enjefo	75	58191.4	8.02	38.1
Wusho	64	64007.1	8.02	38.13
Fetazer	53	35621.3	8.03	38.07
Jembero	44	43901.9	8.02	38.03
Wulberagina Tretiro	27	29510.3	8	38.06
Yesharebena Yetatera	27	34576.3	8	38.04
Arma	38	54227.1	7.98	37.99
Zizeanchona Teredo	37	62541.8	7.97	38.02
Berho	39	26148.1	8.33	37.85
Feregete	18	23740	8.33	37.79
Fikade	30	29567.1	8.32	37.77
Katibari	54	35303.3	8.28	37.89
Kawa	30	13392.1	8.33	37.88
Keramsa	18	17560.8	8.32	37.91
Kola Kabeda	0	17322.2	8.26	37.76
Lencha	46	28453.9	8.33	37.82
Rekaboka	13	15061.8	8.3	37.76
Rumuga	22	38790.5	8.3	37.75
Zebimola	13	22297.4	8.3	37.8
Degan Shimola	26	24807.7	8.31	37.96
Gerbaja	36	23592.3	8.28	37.93
Gora Sede	42	23558.3	8.35	37.91
Odo Bera	39	31963.8	8.38	37.92
Sunka Dincho	46	35416.9	8.34	37.94
Tatesa Wesharbe	58	32054.7	8.32	37.98
Chancho Wutign	31	24535.1	8.33	38
Cheka Demakesh	40	29658	8.35	38.04
Jabdu	3	13164.9	8.39	38
Ubumana Heramba	14	32315.9	8.38	38.02
Wesharbe Legadima	54	29158.2	8.36	37.98
Wolage Sumage	32	27102.2	8.37	38.04
Argoweleti	28	11722.3	8.09	38.57
Bidera Faka	28	32645.3	7.96	38.58
Dida Halibo	49	36371	8.04	38.52
Dida Midore	58	46594	8.06	38.51
Elala Gebiba	44	22763.1	8.01	38.59
Elala Jilano	7	18605.8	8	38.58
Koshe Town	147	78148.9	8.01	38.53
Koshe Akababi	40	9348.33	8	38.54
Semen Koshe	38	24251.1	8.02	38.55
Woja Jare Demeke	26	26023.1	8.02	38.51
Mekakalegna Jare Dembeke	65	30464.4	8.01	38.49
Gola Jare Dembeke	74	28578.9	7.99	38.48
Hobe Jare Dembeke	83	46889.3	8.03	38.48
Kuno Almana	28	47196	8.01	38.45
Kuno Kertefa	69	36700.4	8.04	38.45
Faka Raphi	20	15039.1	7.93	38.55
Goto	78	59259.1	7.96	38.47
Shirnto 1	26	27272.6	7.94	38.52
Shirnto 2	25	15743.4	7.91	38.52
Shirnto 3	19	15130	7.91	38.51
Udasa Gola	40	21309.2	8	38.5
Udasa Raphi	42	21127.5	7.92	38.53
Udasa Washe	30	21718.1	7.96	38.52
Washe Faka	55	39880.9	8	38.53
Degagogot	19	33803.9	8.2	38.31
Dobi	69	68391.6	8.17	38.33
Goyban	83	52159.8	8.14	38.31
Mekicho	32	48820.3	8.14	38.35
Bate Lejano	64	51137.5	8.1	38.48
Debub Shershera	21	24944	8.12	38.42
Dobena Bate	51	5588.55	8.1	38.45
Dobena Gola	27	24841.8	8.09	38.43
Elie	53	32577.2	8.13	38.44
Bate Futo	64	47673.1	8.08	38.48
Beche Bulchano	28	37904.5	8.05	38.49
Dida	73	74548.1	8.07	38.53
Enseno Town	200	129355	8.06	38.47
Enseno Usme	23	29283.1	8.06	38.46
Weja Bate	20	28783.3	8.1	38.54
Beresa	37	34814.9	8.1	38.41
Dubo Tuto	50	21184.3	8.09	38.39
Gedina Aborat	96	68539.3	8.08	38.34
Michayilu	59	64643.2	8.06	38.32
Mirab Embor	9	42311.7	8.11	38.31
Mirab Meskan	18	34962.5	8.1	38.31
Misrak Embor	13	39642.4	8.11	38.35
Misrak Meskan	29	39051.7	8.09	38.36
Wurib	51	60735.8	8.07	38.32
Yetebon	135	73162.3	8.13	38.3
Bamo	85	47161.9	8.12	38.49
Ucha Gename	45	43402.2	8.1	38.51
Yimar Wacho 1	68	45583.1	8.15	38.47
Yimar Wacho 2	49	32259.1	8.14	38.48
Yimar Wacho 3	42	29192.2	8.14	38.49
Meserete Wegeram	33	75434.1	8.23	38.35
Semen Shershera	27	26522.9	8.14	38.42
Sosit Amba	17	26011.8	8.19	38.36
Welensho 1	3	25330.2	8.16	38.38
Welensho 2	23	40085.4	8.15	38.37
Dirama	27	28135.9	8.16	38.41
Jole 2 Ena 3	88	70254.5	8.18	38.49
Jole 1	99	37609.1	8.2	38.47
Shershera Bido	39	23649.1	8.18	38.42
Shershera Machmena	18	18571.7	8.19	38.45
Wita	50	31441.3	8.16	38.45
Chimbe	20	23751.4	8.14	38.24
Furcha	31	30316.8	8.14	38.2
Teklehaymanot	37	54283.9	8.17	38.2
Yasin Awra	5	30952.9	8.16	38.13
Yekoto	27	38960.9	8.15	38.17
Cheza Sefer	46	41528	8.2	38.12
Ginab	35	37677.3	8.21	38.07
Hawariyat Town	36	8212.45	8.24	38.06
Koror	59	51921.3	8.24	38.1
Selam2	16	28158.6	8.19	38.09
Yechane	54	61258.3	8.2	38.15
Yeshehara	38	34701.3	8.24	38.04
Aboj	30	48377.3	8.17	38.25
Anzire	25	28965.1	8.2	38.25
Daba	21	31498.1	8.23	38.16
Kochin	15	23206.1	8.22	38.23
Megeran	30	25557.4	8.21	38.2
Attat	26	27613.4	8.27	38.09
Chebo	30	26102.6	8.29	38.05
Cheret	23	34031.1	8.3	38.02
Mekorkor	23	25955	8.27	38.06
Seba	15	26954.5	8.28	37.99
Wurafuna	13	38483.8	8.26	38
Batina Yekeras	18	23103.9	8.21	38.87
Dengez	45	41993.7	8.19	37.99
Feres Gura	33	16833.8	8.25	37.9
Wukye	44	42436.7	8.22	38.01
Yebejecha Zeregeba	23	30793.8	8.23	37.94
Yewegerewena Chancho	11	19173.7	8.23	37.91
Aguske	27	44004.2	8.27	38.01
Adele Chelelek	51	44628.9	8.16	38.52
Adele Gose	27	23365.2	8.19	38.54
Gose Salen	48	16254.5	8.22	38.53
Adele Kobona Borobor	31	43697.5	8.15	38.56
Adele Silasie Nadefeka	35	51421.5	8.12	38.53
Anati	24	33042.9	8.36	38.57
Buee Town	140	79125.7	8.32	38.55
Buee Zuria	15	22467.8	8.33	38.57
Fato	18	37109.4	8.37	38.5
Firshi	15	18992	8.34	38.52
Gimse	15	24671.4	8.32	38.5
Beke Bisan Jelba	6	13698.8	8.25	38.45
Gumber Nada	5	16731.6	8.27	38.39
Mahberawi Seyat	15	27817.8	8.29	38.42
Melko Kurand	11	9291.54	8.25	38.42
Dega Nurena	31	28465.3	8.28	38.46
Endebuyo	26	32679.4	8.33	38.46
Ishigediye	19	38949.5	8.38	38.46
Iymelal	9	32656.7	8.36	38.44
Amawote Gifitigi	13	39051.7	8.44	38.52
Amawote Laligi	15	30873.4	8.42	38.5
Amawote Moragi	9	41198.5	8.46	38.55
Bono Aygido	1	25830	8.44	38.47
Gereno Betet Wenz	15	18628.5	8.41	38.53
Gereno Enset Tekil	4	27499.8	8.44	38.57
Agam Sanado Golbe	22	15266.3	8.22	38.51
Damu 1	2	27942.8	8.22	38.38
Damu 2	7	20650.4	8.23	38.41
Damu 3	9	22422.4	8.21	38.43
Gogeti 1	31	22081.6	8.23	38.49
Gogeti 2	40	20298.3	8.21	38.49
Gogeti 3	45	26988.6	8.2	38.48
Golbe	40	11960.9	8.25	38.51
Kela Town	70	39971.8	8.26	38.49
Kela Akababi	21	10654.6	8.26	38.48
Kola Nurena	15	19582.7	8.28	38.49
Negesa	19	16595.3	8.28	38.53
Fule Amanuel	10	18219.6	8.4	38.55
Geneta Mariam	10	23705.9	8.41	38.59
Michael Semero	21	24910	8.4	38.65
Suten Town	18	14743.8	8.41	38.62
Suten Akababi	12	34053.8	8.39	38.6
Tiya Town	22	22002.1	8.44	38.61
Adazer	22	30600.7	8.31	38.58
Dachi Hamus Gebeya	44	46435	8.36	38.64
Suatina Gedam	19	22172.5	8.28	38.6
Udugetina Gefersa	19	28896.9	8.31	38.62
Wacho Morege	15	29794.3	8.33	38.63
Berberna Awara(Werebo Baleweld)	23	21513.7	8.22	38.66
Dobana Timuga	19	13710.1	8.27	38.64
Dugda Geriye	42	25057.6	8.13	38.64
Dugda Goro	24	25932.3	8.16	38.65
Ejersa	10	21604.5	8.25	38.68
Rifenso	55	51228.4	8.21	38.62
Soloke Gebriel	9	42697.9	8.25	38.62
Welkitie Town	550	327885	8.28	37.78
Gubre Town	40	28442.6	8.2	37.79
Butajira Town	535	379454	8.12	38.39
